# Supplementary material
Source: HighWire-hosted journal article supplement (https://emj.bmj.com/content/33/11/769)

Fig. S1 Study flow chart of patient inclusion from the Acute Medical Unit. suPAR, soluble urokinase plasminogen activator receptor.

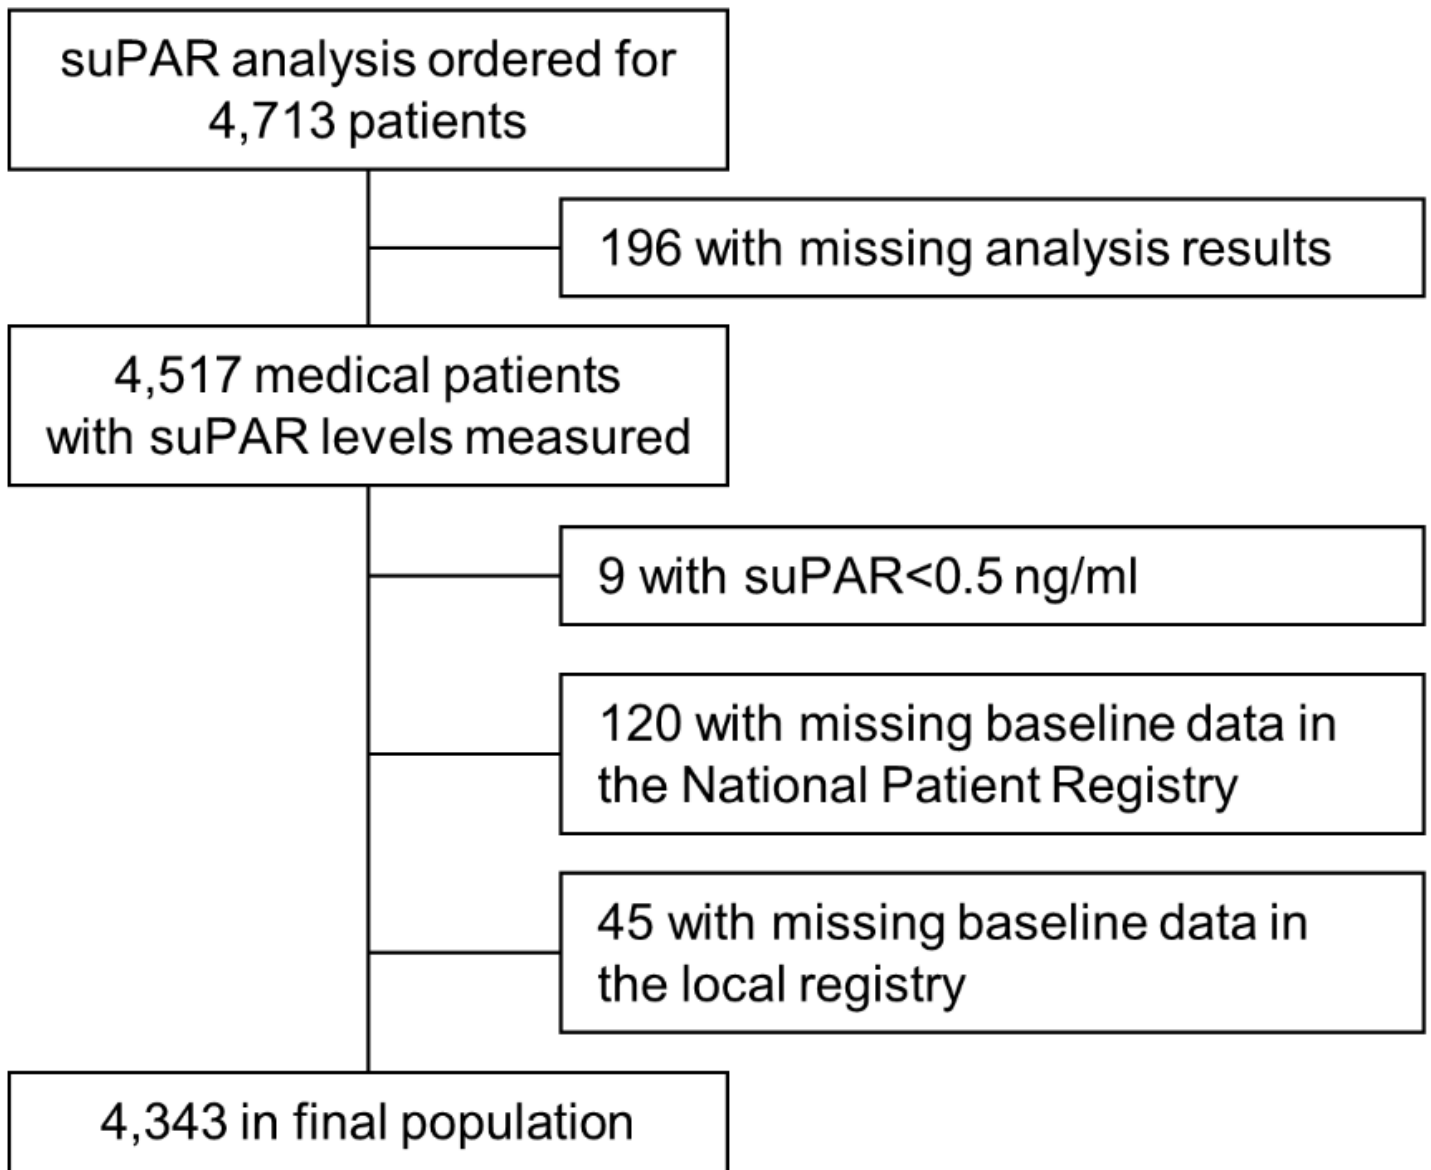

Supplement: inline-supplementary-material-2 [file inline-supplementary-material-2.pdf]
